# Supplementary material
Source: ML conference proceedings conference paper supplement (https://openreview.net/forum?id=rJcLocAJpA6)
Supplement: supplementary_material [file attachment]

# Neural-Symbolic Inference for Robust Autoregressive Graph Parsing via Compositional Uncertainty Quantification

Anonymous EMNLP submission

## Abstract

Pre-trained seq2seq models excel at graph semantic parsing with rich annotated data, but generalize worse to out-of-distribution (OOD) and long-tail examples. In comparison, symbolic parsers under-perform on population-level metrics, but exhibit unique strength in OOD and tail generalization. In this work, we study compositionality-aware approach to neural-symbolic inference informed by model confidence, performing fine-grained neural-symbolic reasoning at subgraph level (i.e., nodes and edges) and precisely targeting subgraph components with high uncertainty in the neural parser. As a result, the method combines the distinct strength of the neural and symbolic approaches in capturing different aspects of the graph prediction, leading to well-rounded generalization performance both across domains and in the tail. We empirically investigate the approach in the English Resource Grammar (ERG) parsing problem on a diverse suite of standard in-domain and seven OOD corpora. Our approach leads to 35.26% and 35.60% error reduction in aggregated SMATCH score over neural and symbolic approaches respectively, and 14% absolute accuracy gain in key tail linguistic categories over the neural model, outperforming prior state-of-art methods that do not account for compositionality or uncertainty.

## 1 Introduction

A structured account of compositional meaning has become a longstanding goal for Natural Language Processing. To this end, a number of efforts have focused on encoding semantic relationships and attributes into graph-based meaning representations (MRs, see Appendix A for details). In particular, graph semantic parsing has been an important task in almost every Semantic Evaluation (SemEval) exercise since 2014. In recent years, we have witnessed the burgeoning of applying neural networks to semantic parsing. Pre-trained language model-based approaches have led to significant improve-

ments across different MRs (Oepen et al., 2019, 2020). However, these models often generalize poorly to out-of-distribution (OOD) and tail examples (Cheng et al., 2019; Shaw et al., 2021; Kim, 2021; Lin et al., 2022), while grammar or rule-based parser work relatively robustly across different linguistic phenomena and language domains (Cao et al., 2021; Lin et al., 2022). See Appendix B-C for a review of related work.

In this paper, we propose a novel compositional neural-symbolic inference for graph semantic parsing, which takes advantage of both uncertainty quantification from a seq2seq parser and prior knowledge from a symbolic parser at the subgraph level (i.e., nodes and edges). We take graph semantic parsing for English Resource Grammar (ERG) as our case study. ERG is a compositional semantic representation explicitly coupled with the syntactic structure. Compared to other graph-based meaning representations like Abstract Meaning Representation (AMR), ERG has high coverage of English text and strong transferability across domains, rendering itself has an attractive target formalism for automated semantic parsing. Furthermore, many years of ERG research has led to well-established symbolic parser and a rich set of carefully constructed corpus across different application domains and fine-grained linguistic phenomena, making it an ideal candidate for studying cross-domain generalization of neural-symbolic methods (Oepen et al., 2002; Crysmann and Packard, 2012).

We start with a novel investigation of the uncertainty calibration behaviour of a T5-based state-of-the-art neural ERG parser (Lin et al., 2022) on the subgraph level (Section 3), where we make some key observations: (1) the performance of the neural parser degrades when it become uncertain at the subgraph level, while (2) the symbolic parser works still robustly when the neural parser is uncertain at the subgraph level. This motivates us to develop a *compositional* neural-symbolic inference

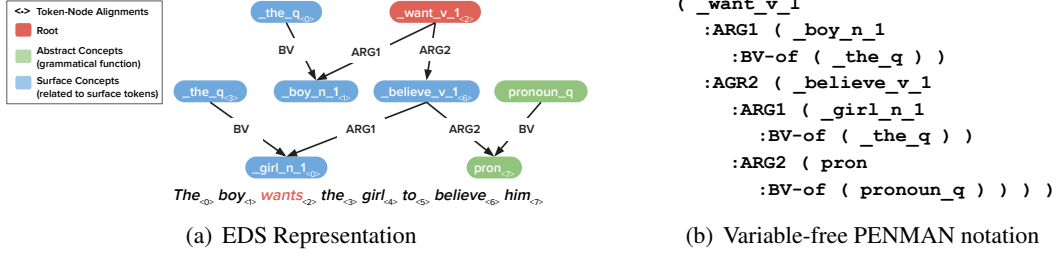

Figure 1: The EDS representation for ERG and the corresponding linearization of the example sentence “The boy wants the girl to believe him”.

process where the neural and symbolic parser collaborates at a more fine-grained level and guided by model uncertainty, which is an aspect missing in the previous neural-symbolic and ensemble parsing literature (see Appendix C).

We then propose a decision-theoretic criteria to allow for neural-symbolic inference at subgraph level (i.e., nodes and edges) and incorporates the neural parser’s fine-grained uncertainty for each graph component prediction (Section 4.1). The key to this approach is a *meta graph*  $\mathcal{G}_M$  that enumerates possible candidates for each node/edge prediction, and is constructed by merging multiple beam predictions from the neural seq2seq model.

The core challenge here is how to properly quantify *compositional uncertainty* using a seq2seq model, i.e., assigning model probability for a node or edge prediction on the graph. For example, our interest is often to express the conditional probability of a graph node  $v$  with respect to its parent  $p(v|pa(v), x)$ , rather than the likelihood of  $v$  conditioning on the previous tokens in the linearized string. As a result, it cannot be achieved by relying on the naive token-level autoregressive probabilities from the beam search. To address this issue, we introduce a simple probabilistic formalism termed *Graph Autoregressive Process* (GAP) (Section 4.2). GAP adopts a dual representation of an autoregressive process and a probabilistic graphical model, and can be used as a powerful medium for expressing a seq2seq model’s compositional uncertainty on the graph.

We demonstrate the effectiveness of our approach in experiments across a diverse suite of eight in-domain and OOD evaluation datasets encompassing domains including Wikipedia entries, news articles, email communications, etc (Section 5). We achieve the best results on the overall performance across the eight domains, attaining 35.26% and 35.60% error reduction in the aggregatexd SMATCH score over the neural and

symbolic parser, respectively. Our approach also exhibits significantly stronger robustness in generalization to OOD datasets and long-tail linguistic phenomena than previous work, while maintaining the state-of-the-art performance on in-domain test. Further study also shows that the compositionality aspects of neural-symbolic inference helps the model to assemble novel graph solution that the original inference process (e.g., beam search or symbolic parse) fails to provide (Section 5.4).

In summary, our contributions are four-fold:

- We present a novel investigation of neural graph parser’s uncertainty calibration performance at *subgraph level* (Section 3). Our study confirms the seq2seq uncertainty is effective for detecting model error even out-of-distribution, establishing the first empirical basis for the utility of *compositional* uncertainty in seq2seq graph parsing.
- We propose a practical and principled framework for neural-symbolic graph parsing that utilizes model uncertainty and exploits compositionality (Section 4.1). The method is fully compatible with modern large pre-trained seq2seq network using beam decoding, and is general-purpose and applicable to any graph semantic parsing task.
- We propose a simple probabilistic formalism (GAP) to express a seq2seq model’s compositional uncertainty (Section 4.2). GAP allows us to go beyond the conventional autoregressive sequence probability and express long-range parent-child conditional probability on the graph, serving as a useful medium of compositional uncertainty quantification.
- We conduct a comprehensive study to evaluate the state-of-art graph parsing approaches across a diverse suite of in-domain and out-of-distribution datasets (Section 5). Our study reveals surprising weakness of previous state-of-art neural-symbolic methods in OOD generalization, and confirms the proposed method significantly improves models OOD and tail performance.

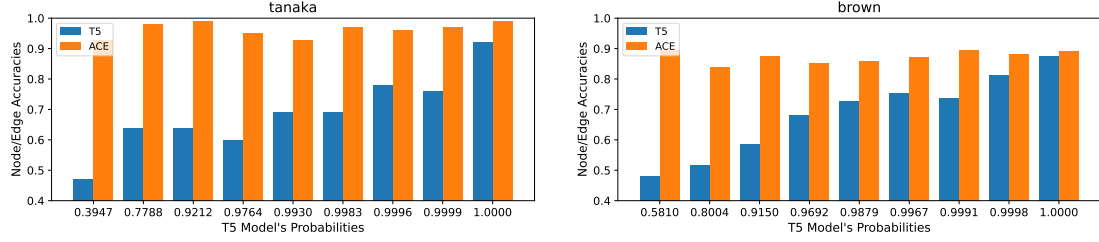

Figure 2: Bar charts for the predictive accuracies of the T5 parser (blue) and ACE parser (orange) for all the node / edge prediction across different uncertainty buckets based on T5 model’s probabilities. The performance is evaluated on the Tanaka and Brown datasets. Each bin represents a quantile bucket of the model probability (i.e., they contain the same number of examples).

**Reproducibility.** We will release the code on Github.

## 2 Background

### 2.1 English Resource Grammar (ERG)

In this work, we take the representations from English Resource Grammar (ERG; [Flickinger et al., 2014](#)) as our target meaning representations. ERG is a broad-coverage computational grammar of English that derives underspecified logical-form representations of meaning ([Oepen and Flickinger, 2019](#)). It is rooted in the general linguistic theory of Head-driven Phrase Structure Grammar (HPSG; [Pollard and Sag, 1994](#)).

ERG can be presented into different types of annotation formalism ([Copestake et al., 2005](#)). This work focuses on the Elementary Dependency Structure (EDS; [Oepen and Lønning, 2006](#)) which is a compact representation that can be expressed as a directed acyclic graph (DAG) and is widely adopted in the neural parsing approaches ([Buys and Blunsom, 2017](#); [Chen et al., 2018](#)). An example is shown in Figure 1(a).

### 2.2 Parsing Approaches

In this section, we review the state-of-the-art symbolic and neural parsers utilized in our work, i.e., the ACE parser ([Crysmann and Packard, 2012](#)) and the T5 parser ([Lin et al., 2022](#)). Appendix B reviews other ERG parsing techniques.

**The symbolic parser: ACE.** The ACE parser ([Crysmann and Packard, 2012](#)) is one of the state-of-the-art symbolic parser. It first decompose sentences into ERG-consistent candidate derivation trees, and the parser will rank candidates based on the structural features in the nodes of the derivation trees via maximum entropy models ([Oepen and Lønning, 2006](#); [Toutanova et al., 2005](#)). This approach fails to parse sentences for which no valid

derivation is found.

**The neural parser: T5.** [Lin et al. \(2022\)](#) proposed a T5-based ERG parser which achieves the best known results on the in-domain DeepBank benchmark. It is the first work that successfully transfers the ERG parsing problem into a pure end-to-end translation problem via compositionality-aware tokenization and a variable-free top-down graph linearization based on the PENMAN notation ([Kasper, 1989](#)). Figure 1(b) shows an example of the linearized graph string from the original EDS graph.

## 3 Motivation: Subgraph-level Uncertainty in Seq2seq Graph Parsing

We hypothesize that when the neural seq2seq model is uncertain at the subgraph level, it is more likely to make mistakes. Assuming the symbolic parser performs more robustly in these situations, we can then design a procedure to ask the symbolic parser for help when the model is uncertain. To validate this hypothesis, we conduct experiments to empirically explore the following two questions: (1) how does the model perform when it is uncertain at the subgraph level? and (2) how does the symbolic parser perform when the model is uncertain?

First, we compute model probabilities for each graph element (i.e., node and edge) prediction (see Section 4.2 for how to compute these quantities), and identify the corresponding ACE parser prediction using the graph matching algorithm from SMATCH ([Cai and Knight, 2013](#)). We then evaluate the accuracies of those graph element predictions with respect to the gold labels, and compare it to that of the ACE parser.

In Figure 2, we plot the bar charts compare the neural and symbolic performance in different bucket of seq2seq model uncertainties on the two largest datasets (e.g., Tanaka and Brown, see Ap-

pendix H). Results on other datasets can be found in the Appendix L. As shown in the figure, low model probability generally corresponds to low T5 performance, while the corresponding ACE parser’s accuracies spread relatively stably (e.g., it attains  $> 90\%$  accuracy in the lowest-confidence buckets, while T5 accuracy is  $< 50\%$ ). This implies that when the model is uncertain, the accuracy of the neural model tend to be low, while the ACE parser still performs well. This has motivated us to develop a *compositional* neural-symbolic inference procedure guided the model’s subgraph level uncertainty, such that the T5 and ACE parser can collaborate at a more fine-grained level via *compositional uncertainty quantification* (Section 4).

## 4 Methods

**Notation & Problem Statement.** For graph semantic parsing, the input is a natural language utterance  $x$ , and the output is a directed acyclic graph (DAG)  $G = \langle \mathbf{N}, \mathbf{E} \rangle$ , where  $\mathbf{N}$  is the set of nodes and  $\mathbf{E} \in \mathbf{N} \times \mathbf{N}$  is the set of edges (e.g., Figure 1(a)). In the case of seq2seq parsing,  $G$  is represented as a linearized graph string  $g = s_1 s_2 \dots s_L$  consists of symbols  $\{s_l\}_{l=1}^L$  (e.g., Figure 1(b)). As the graph prediction is probabilistic, each of the graph element  $v \in \mathbf{N} \cup \mathbf{E}$  is a random variable whose values are the symbols  $s_i$  observed from the beam outputs, leading to marginal probabilities  $p(v = s_i|x)$  and conditional probabilities  $p(v = s_i|v' = s_j, x)$ .

To this end, our goal is to produce a principled inference procedure for graph prediction accounting for model uncertainty on predicting graph elements  $v \in G$ . In the sequel, Section 4.1 presents a decision-theoretic criteria that leverages the graphical model likelihood  $p(G|x)$  to conduct compositional neural-symbolic inference for graph prediction. To properly express the graphic model likelihood  $p(G|x) = \prod_{v \in G} p(v|pa(v), x)$  using a learned seq2seq model, Section 4.2 introduces a simple probabilistic formalism termed *Graph Autoregressive Process* (GAP) to translate the autoregressive sequence probability from the seq2seq model to graphical model probability. Appendix F discusses some additional extensions.

### 4.1 Compositional Neural-Symbolic Inference

Previously, an uncertainty-aware decision criteria was proposed for neural-symbolic inference based on the Hurwicz pessimism-optimism criteria

$R(G|x)$  (Lin et al., 2022). Specifically, the criteria is written as:

$$R(G|x) = \alpha(x) * R_p(G|x) + (1 - \alpha(x)) * R_0(G),$$

where  $R(G|x) = -\log p(G|x)$  is the neural model likelihood,  $R_0(G) = \log p_0(G)$  is the symbolic prior likelihood, and  $\alpha(x)$  is a the uncertainty-driven trade-off coefficient to balance between the optimistic MLE criteria  $R_p(G|x)$  and the pessimistic, prior-centered criteria  $R_0(G|x)$  centered around symbolic prediction  $G_0$ .

A key drawback of this approach is the lack of accounting for the compositionality. This motivates us to consider synthesizing the multiple graph predictions  $\{G_k\}_{k=1}^K$  from the neural parser to form a *meta graph*  $\mathcal{G}$ <sup>1</sup>, where we can leverage the disentangled uncertainty of  $p(G|x)$  to perform fine-grained neural-symbolic inference for each graph component  $v \in G$  (i.e., nodes or edges). Specifically, we leverage the factorized graphical model likelihood  $p(G|x) = \prod_{v \in G} p(v|pa(v), x)$  to decompose the overall decision criteria  $R(G|x)$  into that of individual components  $R(v|x)$ :

$$R(v|x) = \alpha(v|x) * \log p(v|pa(v), x) + (1 - \alpha(v|x)) * \log p_0(v), \quad (1)$$

and the overall criteria is written as  $R(G|x) = \sum_{v \in G} R(v|x)$ . Here  $pa(v)$  refers to the parents of  $v$  in  $G$ , and  $\alpha(v|x) = \text{sigmoid}(-\frac{1}{T}H(v|x) + b)$  is the component-specific trade-off parameter driven by model uncertainty  $H(v|x) = -\log p(v|pa(v), x)$ , and  $(T, b)$  are scalar calibration hyperparameters that can be tuned on the dev set.

Following previous work (Lin et al., 2022), the symbolic prior  $p_0$  for each graph component  $v$  is defined as a Boltzmann distribution based on the graph output  $G_0$  from the symbolic parser, i.e.,  $p_0(v = s) \propto \exp(I(s \in G_0))$ , so that it is proportional to the empirical probability of whether a symbol  $s$  appears in  $G_0$ . Notice that we have ignored the normalizing constants since they do not impact optimization.

Algorithm 1 summarizes the full algorithm. As shown, during inference, the method proceeds by starting from the root node  $v_0$  and selects the optimal prediction  $\hat{v}_0 =$

<sup>1</sup>Given a group of candidate graphs  $\{G_k\}_{k=1}^K$ , well-established algorithm exists to synthesize different graph predictions into a *meta graph*  $\mathcal{G}$  (Cai and Knight, 2013; Hoang et al., 2021) (see Appendix G for a more detailed review).



$\arg \max_{c_0 \in \text{Candidate}(v_0)} R(c_0|x)$ , where  $c_0$  are different candidates for  $v_0$  given by the the *meta graph*  $\mathcal{G}$ . The algorithm then recursively performs the same neural-symbolic inference procedure for the children of  $v_0$  (i.e.,  $\text{ch}(v)$ ). The algorithm terminates when the optimal candidates for all graph variables  $v \in G$  are determined.

As a result, the algorithm is able to adaptively combine subgraph predictions across multiple beam candidates thanks to the meta graph  $\mathcal{G}$ , and appropriately weight between the local neural and symbolic information thanks to the uncertainty-aware decision criteria  $R(v|x)$ . Empirically, this also gives the algorithm the ability to synthesize novel graph predictions that are distinct from its base models (Section 5.4).

---

**Algorithm 1** Compositional Neural-Symbolic Inference

---

**Inputs:**

Meta graph  $\mathcal{G}$   
 Graphical model likelihood  $\log p(G|x)$   
 Symbolic prior  $p_0$

**Output:**

Neural-symbolic graph prediction  $G$

**Initialize:**

$v = \text{root}(G_M)$ ;  $G = \mathcal{G}_M$ .

**if**  $G$  does not contain undecided candidates **then return**  $G$   
**else**

**for**  $c_v \in \text{Candidate}(v)$  **do**

    Compute decision criteria  $R(c_v|x)$  (Equation 1)

    Select optimal candidate  $\hat{v} = \arg \max_c R(c|x)$

    Remove non-optimal candidates of  $v$  from  $G$

    Recursively perform Algorithm 1 for all  $v' \in \text{ch}(v)$

---

## 4.2 Compositional Uncertainty Quantification with Graph Autoregressive Process (GAP)

To properly model the uncertainty  $p(G|x)$  from a seq2seq model, we need an intermediate probabilistic representation to translate the raw token-level probability to the distribution over graph elements.

To this end, we introduce a simple probabilistic formalism termed *Graph Autoregressive Process* (GAP), which is a probability distribution assigning seq2seq learned probability to the graph elements  $v \in G$ . Specifically, as the seq2seq-predicted graph adopts both a sequence-based representation  $g = s_1, \dots, s_L$  and a graph representation  $G = \langle \mathbf{N}, \mathbf{E} \rangle$ , the GAP model adopts both an autoregressive representation  $p(g|x) = \prod_i p(s_i|s_{<i}, x)$  (Section 4.2.1), and also a probabilistic graphical model representation  $p(G|x) = \prod_{v \in G} p(v|\text{pa}(v), x)$  (Section 4.2.2). Both representations share the same set of underlying probability measures (i.e., the graphical-model likelihood  $p(G|x)$  can be derived from the autoregressive probabilities  $p(s_i|s_{<i}, x)$ ) (Figure

3), rendering itself a useful medium for principled compositional neural-symbolic inference using seq2seq probabilities.

### 4.2.1 Autoregressive Representation for Linearized Sequence $g$

Given an input sequence  $x$  and output sequence  $y = y_1 y_2 \dots y_N$ , the token-level autoregressive distribution from a seq2seq model is  $p(y|x) = \prod_{i=1}^N p(y_i|y_{<i}, x)$ . In the context of graph parsing, the output sequence describes a linearized graph  $g = s_1 s_2 \dots s_L$ , where each symbol  $s_i = \{y_{i_1} y_{i_2} \dots y_{i_{N_i}}\}$  represents either a node  $n \in \mathbf{N}$  or an edge  $e \in \mathbf{E}$  of the graph and corresponds to a collection of beam-decoded tokens  $\{y_{i_1} y_{i_2} \dots y_{i_{N_i}}\}$ , e.g., the node `_the_q` in Figure 1(a) is represented by tokens `{_, the, _q}`. This process is illustrated in follows:

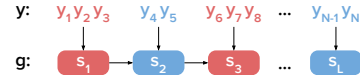

To this end, the *Graph Autoregressive Process* (GAP) assigns probability to each linearized graph  $g = s_1 s_2 \dots s_L$  autoregressively as  $p(g|x) = \prod_{i=1}^L p(s_i|s_{<i}, x)$ , and the conditional probability  $p(s_i|s_{<i}, x)$  is computed by aggregating the token probability:

$$p(s_i|s_{<i}, x) = p(\{y_{i_1} \dots y_{i_{N_i}}\}|s_{<i}, x) = \prod_{j=1}^{N_i} p(y_{i_j}|y_{i_{<j}}, s_{<i}, x)$$

**Marginal and Conditional Probability.** Importantly, GAP allows us to compute the marginal and (non-local) conditional probabilities for graph elements  $s_i$ . Given the input  $x$ , the marginal probability of  $s_i$  is computed as

$$p(s_i|x) = \int_{s_{<i}} p(s_i|s_{<i}, x) p(s_{<i}|x) ds_{<i}$$

by integrating over the space of all possible subsequences  $s_{<i}$  prior to the symbol  $s_i$ . Then, the (non-local) conditional probability between two graph elements  $(s_i, s_j)$  with  $i < j$  is computed as

$$p(s_j|s_i, x) = \int_{s_{i \rightarrow j}, s_{<i}} p(s_i, s_{i \rightarrow j}|s_i, s_{<i}, x) p(s_i|s_{<i}, x) p(s_{<i}|x) ds_{i \rightarrow j} ds_{<i}$$

by integrating over the space of subsequences  $s_{i \rightarrow j}$  between  $(s_i, s_j)$  and the subsequence  $s_{<i}$  before  $s_i$ . Higher order conditional (e.g.,  $p(s_j|(s_i, s_l), x)$ ) can be computed analogously. Notice this gives us the ability to reason about long-range dependencies between non-adjacent symbols on the sequence. Furthermore, the conditional probability on the

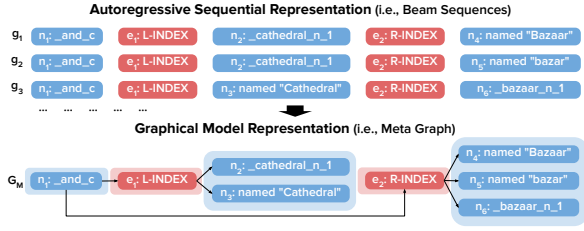

Figure 3: Visual illustration of constructing graphical model representation  $\mathcal{G}_M$  from autoregressive representation  $\{g_k\}_{k=1}^K$ . The example here represents the sentence “The Cathedral and the Bazaar” from the Eric Raymond Essay dataset. Note that here we have omitted the brackets in  $g$  for simplicity (see 1(b)).

*reverse* direction can also be computed using the Bayes’ rule:  $p(s_i|s_j, x) = \frac{p(s_j|s_i, x)p(s_i|x)}{p(s_j|x)}$ .

**Efficient Estimation Using Beam Outputs.** In practice, we can estimate  $p(s_i|x)$  and  $p(s_j|s_i, x)$  efficiently via importance sampling using the output from the beam decoding  $\{g_k\}_{k=1}^K$ , where  $K$  is the beam size (Malinin and Gales, 2020). The marginal probability can be computed as

$$\hat{p}(s_i|x) = \sum_{k=1}^K p(s_i|s_{k,<i}, x) * \pi_k \quad (2)$$

where  $\pi_k = \frac{\exp(\frac{1}{t} \log p(g_k|x))}{\sum_{k=1}^K \exp(\frac{1}{t} \log p(g_k|x))}$  is the importance weight proportional to the beam candidate  $g_k$ ’s log likelihoods, and  $t > 0$  is the temperature parameter fixed to a small constant (e.g.,  $t = 0.1$ , see Appendix D.1 further discussion) (Malinin and Gales, 2020). If the symbol  $s_i$  does not appear in the  $k^{th}$  beam, we set  $p(s_i|s_{k,<i}, x) = 0$ .

Then, for two symbols  $(s_i, s_j)$  with  $i < j$ , we can estimate the joint probability as

$$\hat{p}(s_j|s_i, x) = \sum_{k=1}^K p(s_j|s_i, s_{k,i \rightarrow j}, s_{k,<i}, x) * \pi_k^i \quad (3)$$

where  $\pi_k^i = \frac{\exp(\frac{1}{t} \log p(g_k|x)) * I(s_i \in g_k)}{\sum_{k=1}^K \exp(\frac{1}{t} \log p(g_k|x)) * I(s_i \in g_k)}$  is the importance weight among beam candidates that contains  $s_i$ . Notice this is different from Equation 2 where  $\pi_k$  is computed over all beam candidates regardless of whether it contains  $s_i$ .

#### 4.2.2 Probabilistic Graphical Model Representation for $G$

So far, we have focused on probability computation based on the graph’s linearized representation  $p(g|x) = \prod_i p(s_i|s_{<i}, x)$ . To conduct the compositional neural-symbolic inference (Section 4.1), we also need to consider GAP’s graphical model representation  $p(G|x) = \prod_{v \in G} p(v|pa(v), x)$ .

GAP’s graphical model representation  $G$  de-

pends on the *meta graph*  $\mathcal{G}$  constructed from  $K$  candidate graphs  $\{G_k\}_{k=1}^K$  (Section 4.1). Figure 3 shows an example, where  $n_i$  and  $e_j$  are the candidates for the node and edge predictions collected from beam sequences. Compared to the sequence-based representation  $g$ ,  $\mathcal{G}$  provides two advantages: it (1) explicitly enumerates different candidates for each node and edge prediction (e.g.,  $n_2$  v.s.  $n_3$  for predicting the third element), and (2) provides an explicit account of the parent-child relationships between variables on the graph (e.g.,  $e_2$  is a child node of  $n_1$  in the predicted graph, which is not reflected in the autoregressive representation). From the probabilistic learning perspective,  $\mathcal{G}$  describes the space of possible graphs (i.e., the *support*) for a graph distribution  $p(G|x) : G \rightarrow [0, 1]$ .

To this end, GAP assigns proper graph-level probability  $p(G|x)$  to graphs  $G$  sampled from the meta graph  $\mathcal{G}$  via the graphical model likelihood:

$$\begin{aligned} p(G|x) &= \prod_{v \in G} p(v|pa(v), x) \\ &= \prod_{n \in \mathbf{N}} p(n|pa(n), x) * \prod_{e \in \mathbf{E}} p(e|pa(e), x) \end{aligned}$$

where  $p(v|pa(v), x)$  is the conditional probability for  $v$  with respect to their parents  $pa(v)$  in  $G$ . Given the candidate graphs  $\{G_k\}_{k=1}^K$ , we can express the likelihood for  $p(v|pa(v), x)$  by writing down a multinomial likelihood enumerating over different values of  $pa(v)$  (Murphy, 2012). This in fact leads to a simple expression for the model likelihood as a simple averaging of the beam-sequence log likelihoods:

$$\log p(n|pa(n), x) \propto \frac{1}{K} \sum_{k=1}^K \log p(n|pa(n) = c_k) \quad (4)$$

where  $c_k$  is the value of  $pa(n)$  in  $k^{th}$  beam sequence, and the conditional probabilities are computed using Equation (3). See Appendix E for a detailed derivation.

---

#### Algorithm 2 Graph Autoregressive Process

---

**Inputs:**

Beam candidates with probabilities  $\{p(g_k|x)\}_{k=1}^K$   
*Meta graph*  $\mathcal{G}$

**Output:**

Marginal probabilities  $\{p(s|x)\}$   
 Graph model likelihood  $\log p(G|x)$

**for**  $v \in G$  **do**

  Compute marginal likelihood:

$p(v = s|x)$  (Equation 2)

  Compute graphical model likelihood:

$\log p(v = s|pa(v), x)$  (Equation 4)

**return**  $\{p(v|x)\}, \log p(G|x) = \sum_{v \in G} \log p(v|pa(v), x)$

---

In summary, for each graph element variable  $v \in G$ , GAP allows us to compute the graphical-model conditional likelihood  $p(v|pa(v), x)$  via its graphical model representation, and also to compute the marginal probability  $p(v|x)$  via its autoregressive presentation. The conditional likelihood is crucial for neural-symbolic inference (Section 4.1), and the marginal probability is useful for sparsity regularization in global graph structure inference (Appendix F). Algorithm 2 summarizes the full GAP computation.

## 5 Experiments

### 5.1 Experiment Setup

**Datasets.** Consistent with previous ERG works, we train the neural model on DeepBank v1.1 annotation of the Wall Street Journal (WSJ), sections 00-21 (the same text annotated in the Penn Tree Bank) that correspond to ERG version 1214.

For OOD evaluation, we select 7 diverse datasets from the Redwoods Treebank corpus: Wikipedia (Wiki), the Brown Corpus (Brown), the Eric Raymond Essay (Essay), customer emails (E-commerce), meeting/hotel scheduling (Verbomobil), Norwegian tourism (LOGON) and the Tanaka Corpus (Tanaka) (See Appendix H for more details).

**Model.** Following Lin et al. (2022), We train a  $T5_{large}$  using the official T5X finetune pipeline<sup>2</sup>, and use beam search with size  $K = 5$  at inference time. Further details are collected in Appendix I.

**Evaluation.** we use the standard eval metric SMATCH (Cai and Knight, 2013), which computes the maximum F1-score obtainable from an alignment between the predicted and gold graphs. We evaluate the models’ average-case performance on all the 8 in-domain and OOD datasets, and also conduct fine-grained evaluation of the models’ tail generalization performance across 19 important linguistic subcategories (Appendix K, Table 2).

**Baselines.** We compare with two recent state-of-the-art approaches from the neural-symbolic and ensemble graph parsing literature, respectively. (see Appendix C for a review) (1) Lin et al. (2022) is uncertainty-aware neural-symbolic framework method attained state-of-the-art performance on the in-domain DeepBank test set, and (2) Hoang et al. (2021), a majority-voting-based graph ensemble method that uses a voting strategy based on beam

|                    | #     | T5    | ACE          | Vote  | Collab.      | Ours         | ACE*  |
|--------------------|-------|-------|--------------|-------|--------------|--------------|-------|
| WSJ (in-domain)    | 1,437 | 96.56 | 87.14        | 88.22 | <b>97.01</b> | <u>96.77</u> | 90.94 |
| Wiki               | 1,307 | 90.12 | 80.25        | 80.55 | <b>90.58</b> | <u>90.04</u> | 90.42 |
| Brown              | 2,182 | 92.05 | 91.74        | 85.46 | <b>93.58</b> | <u>93.11</u> | 93.20 |
| Essay              | 591   | 92.19 | 92.64        | 83.72 | <b>93.57</b> | <u>93.76</u> | 93.52 |
| E-commerce         | 1,114 | 93.15 | <u>97.25</u> | 87.38 | 95.44        | <b>97.37</b> | 98.36 |
| Verbomobil         | 931   | 90.06 | <u>95.15</u> | 84.80 | 92.24        | <b>96.42</b> | 97.62 |
| LOGON              | 1,895 | 87.13 | <b>93.58</b> | 80.11 | 92.88        | <u>93.33</u> | 94.17 |
| Tanaka             | 2,796 | 95.24 | <b>98.38</b> | 91.03 | 96.79        | <u>98.14</u> | 98.55 |
| Mean w/ in-domain  | -     | 92.06 | 92.02        | 85.16 | <u>94.01</u> | <b>94.86</b> | 94.60 |
| Mean w/o in-domain | -     | 91.50 | 92.63        | 84.72 | <u>93.64</u> | <b>94.62</b> | 95.05 |

Table 1: SMATCH for T5, ACE, and collaborative/compositional inference. # refers to the number of sentences in the dataset. ACE\* refers to the evaluation results only for valid parse. Collab. refers to collaborative inference from Lin et al. (2022). Vote refers to voting strategy from Hoang et al. (2021). The **bold** and underlined refer to the best and the second best results.

sequences from the T5 model and predictions from the ACE parser<sup>3</sup>. It doesn’t exploit uncertainty.

### 5.2 Results

The results are shown in Table 1. Detailed in-domain comparison with other previous work is in Appendix J. As shown, among the base models, the T5 and ACE parser achieve similar overall performance, with T5 strongly outperforms on in-domain data but underperforms on the OOD data (see last row in Table 1). Our approach achieves best results on overall performance, which is  $\sim 35\%$  error reduction in aggregated SMATCH score over the T5-based and symbolic approaches.

We now compare with the previous state-of-the-art methods. Though in-domain performance is not the focus of this work, our approach is still comparable to **Collab**, i.e., the neural-symbolic method from Lin et al. (2022). However, on the challenging out-of-domain eval sets (e.g., E-commerce, Verbomobil whose topic and style are significantly different from WSJ), the performance of **Collab** starts to deteriorate. In comparison, our neural-symbolic approach remains robust out-of-domain. Its performance stays competitive with and even sometimes outperforms the ACE parser on difficult domains, illustrating the advantage of compositionality.

We also notice that the voting-based ensemble method **Vote** (Hoang et al., 2021) performs poorly in the neural-symbolic setting, despite based a moderate number of beam sequences. This is likely because the majority-voting approach requires a

<sup>2</sup><https://github.com/google-research/t5x/blob/main/t5x/train.py>

<sup>3</sup>We have tried several other variants for the voting candidates, e.g., top K predictions from the T5 parser and top 1 prediction + ACE prediction. It turns out the best one is using top K predictions from the T5 parser and ACE predictions.

| Type                             | Essay |       |               |               |               | E-commerce |        |       |               |               | Verbmobil |        |       |               |               |
|----------------------------------|-------|-------|---------------|---------------|---------------|------------|--------|-------|---------------|---------------|-----------|--------|-------|---------------|---------------|
|                                  | #     | ACE   | T5            | Collab.       | Ours          | #          | ACE    | T5    | Collab.       | Ours          | #         | ACE    | T5    | Collab.       | Ours          |
| Compound                         | 671   | 83.76 | 73.39         | 76.75         | <b>80.26</b>  | 844        | 95.50  | 67.96 | 83.22         | <b>94.94</b>  | 308       | 86.36  | 67.41 | 68.13         | <b>87.50*</b> |
| Nominal <i>w/ nominalization</i> | 15    | 80.00 | <b>80.00</b>  | 73.33         | <b>80.00</b>  | 6          | 100.00 | 77.78 | <b>100.00</b> | <b>100.00</b> | -         | -      | -     | -             | -             |
| Nominal <i>w/ noun</i>           | 521   | 88.68 | 76.84         | 80.79         | <b>84.56</b>  | 682        | 95.60  | 72.67 | 86.93         | <b>95.45</b>  | 194       | 95.88  | 77.80 | 83.50         | <b>95.15</b>  |
| Verbal                           | 18    | 72.22 | 57.89         | 73.68*        | <b>78.95*</b> | -          | -      | -     | -             | -             | -         | -      | -     | -             | -             |
| Named entity                     | 74    | 67.57 | <b>71.05*</b> | 68.42*        | 60.53         | 28         | 92.86  | 77.49 | 80.00         | <b>93.33*</b> | 80        | 62.50  | 56.51 | 52.50         | <b>67.50*</b> |
| Argument structure               | 3,314 | 87.09 | 82.63         | <b>85.52</b>  | 85.26         | 5,932      | 95.79  | 83.60 | 88.47         | <b>94.73</b>  | 4,206     | 95.29  | 77.52 | 86.57         | <b>94.56</b>  |
| Total verb                       | 1,616 | 83.66 | 81.11         | <b>83.78*</b> | 82.56         | 4,504      | 95.12  | 83.48 | 87.36         | <b>93.90</b>  | 2,330     | 95.19  | 82.25 | 89.36         | <b>94.35</b>  |
| Basic verb                       | 895   | 83.35 | 82.01         | <b>84.71*</b> | 83.50*        | 2,910      | 94.85  | 87.20 | 90.14         | <b>92.77</b>  | 1,206     | 94.36  | 89.15 | 91.48         | <b>94.48*</b> |
| ARG1                             | 694   | 88.90 | 88.26         | <b>90.61*</b> | 88.62         | 2,494      | 96.79  | 95.64 | 97.08*        | <b>97.31*</b> | 1,168     | 96.75  | 95.40 | 95.27         | <b>96.90*</b> |
| ARG2                             | 708   | 88.28 | 86.69         | <b>89.04*</b> | 88.77*        | 2,660      | 97.14  | 91.11 | 93.36         | <b>97.20*</b> | 876       | 95.89  | 89.34 | 93.91         | <b>95.65</b>  |
| ARG3                             | 69    | 83.61 | 78.57         | 78.57         | <b>80.14</b>  | 382        | 90.05  | 70.91 | 75.13         | <b>78.07</b>  | 62        | 93.55  | 67.56 | 87.50         | <b>96.88*</b> |
| Verb-particle                    | 721   | 84.05 | 79.99         | 65.15         | <b>81.41</b>  | 1,592      | 95.61  | 76.94 | 82.31         | <b>95.95*</b> | 1,124     | 96.09  | 74.14 | 87.07         | <b>94.22</b>  |
| ARG1                             | 620   | 87.90 | 84.39         | <b>86.53</b>  | 85.58         | 1,448      | 96.27  | 80.77 | 84.73         | <b>96.62*</b> | 1,096     | 96.53  | 80.20 | 90.77         | <b>96.90*</b> |
| ARG2                             | 498   | 86.14 | 84.96         | 86.52*        | <b>88.77*</b> | 888        | 96.85  | 71.30 | 81.33         | <b>95.56</b>  | 424       | 94.34  | 66.73 | 78.90         | <b>92.66</b>  |
| ARG3                             | 62    | 79.03 | 65.15         | 65.15         | <b>74.24</b>  | 208        | 93.27  | 69.05 | 83.02         | <b>96.23*</b> | 24        | 83.33  | 47.17 | <b>58.33</b>  | <b>58.33</b>  |
| Total noun                       | 189   | 91.53 | 82.90         | 86.01         | <b>86.49</b>  | 90         | 100.00 | 76.81 | 78.26         | <b>97.83</b>  | 26        | 92.31  | 69.00 | <b>93.33*</b> | <b>93.33*</b> |
| Total adjective                  | 1,336 | 90.64 | 84.36         | 87.13         | <b>88.39</b>  | 1,116      | 97.67  | 84.62 | 93.07         | <b>97.34</b>  | 1,838     | 95.43  | 72.54 | 82.75         | <b>94.81</b>  |
| Reentrancy                       | 850   | 80.59 | 78.39         | <b>81.26*</b> | 77.01         | 1,686      | 95.73  | 75.83 | 81.59         | <b>84.76</b>  | 800       | 93.25  | 60.23 | 72.77         | <b>89.20</b>  |
| passive                          | 173   | 86.71 | 83.33         | <b>88.89*</b> | 86.71         | 222        | 98.20  | 85.56 | 92.11         | <b>97.37</b>  | 12        | 100.00 | 79.10 | <b>100.00</b> | <b>100.00</b> |

Table 2: Comparing ACE, Collab. (Lin et al., 2022) and our parsers on fine-grained linguistic categories. All scores are reported in accuracy. The gray colored row means long-tail phenomenon ( $< 500$  cases in the training set). The **bold** indicates the best results among neural approaches (T5, Collab. and Ours). \* indicates the result is better than ACE parser.

large number of diverse predictions from distinct models. When there are only two models, the ability of quantifying uncertainty becomes important.

### 5.3 Fine-grained Linguistic Evaluation

ERG provides different levels of linguistic information that can benefit many NLP tasks, e.g., named entity recognition and semantic role labeling. This rich linguistic annotation provides an opportunity to evaluate model performance in meaningful population subgroups. Detailed description of those linguistic phenomena is in Appendix K.

Result is in Table 2. As shown, on OOD datasets, the T5 parser underperforms the ACE parser on most of the linguistic categories. Our approach outperforms both the neural model and the non-compositional neural-symbolic method especially on long-tail categories (the gray colored rows in the table), attaining an  $> 14\%$  average absolute gain compared to the base model. In some categories, our method even outperforms the ACE parser while all base model underperforms, e.g., ARG3 of basic verb on Verbmobil and ARG3 of verb-particle on E-commerce.

### 5.4 Case Study: Synthesizing Novel Graphs

To test if our methods can generate optimal graph solution which the base models fail to obtain, we further explore the percentage of novel graphs (graphs that are not identical to any of the candidate predictions of the neural or symbolic model) for each dataset, and compare the corresponding SMATCH scores on those novel cases. The results

|            | %     | Top 1 | Top 2 | Top 3 | Top 4 | Top 5 | Collab. | ACE          | Ours         |
|------------|-------|-------|-------|-------|-------|-------|---------|--------------|--------------|
| In-domain  | 31.25 | 94.95 | 93.01 | 91.91 | 89.92 | 89.58 | 95.10   | 82.80        | <b>98.44</b> |
| Wiki       | 32.29 | 87.55 | 86.54 | 85.56 | 86.00 | 83.90 | 88.77   | 82.67        | <b>92.24</b> |
| Brown      | 46.84 | 90.54 | 89.34 | 88.57 | 88.10 | 87.11 | 92.53   | 96.15        | <b>96.56</b> |
| Essay      | 50.93 | 90.71 | 90.02 | 89.31 | 89.02 | 87.60 | 92.41   | 95.73        | <b>96.08</b> |
| E-commerce | 34.65 | 90.03 | 88.34 | 86.61 | 85.56 | 82.91 | 92.82   | <b>98.96</b> | 97.54        |
| Verbmobil  | 39.96 | 85.45 | 83.06 | 81.54 | 79.30 | 78.27 | 88.42   | <b>97.78</b> | 96.70        |
| LOGON      | 58.10 | 90.75 | 89.65 | 88.20 | 87.90 | 86.95 | 92.50   | 96.70        | <b>97.06</b> |
| Tanaka     | 24.89 | 89.35 | 87.46 | 85.60 | 83.55 | 83.16 | 92.30   | 98.23        | <b>98.27</b> |
| All        | 38.76 | 90.57 | 89.18 | 88.01 | 87.24 | 86.13 | 92.29   | 93.93        | <b>96.28</b> |

Table 3: SMATCH performance on novel graphs, where the results of our inference process are not identical to any of the candidates from the base model.

are shown in Table 3. We see that our method synthesize novel graph parses that are in general of higher quality than that of the base models, thanks to the calibrated uncertainty (Section 4.2). This indicates the compositional neural-symbolic inference can synthesize evidence across neural and symbolic results and produce novel graphs that are closer to ground truth.

## 6 Conclusions

We have shown how to perform accurate and robust semantic parsing across a diverse range of genres and linguistic categories for English Resource Grammar. We achieve this by taking the advantage of both the symbolic parser (ACE) and the neural parser (T5) at a fine-grained subgraph level using compositional uncertainty, an aspect missing in the previous neural-symbolic or ensemble parsing work. Our approach attains the best known result on the aggregated SMATCH score across eight evaluation corpus from Redwoods Treebank, attaining 35.26% and 35.60% error reduction over the neural and symbolic parser, respectively.



## Limitation

Here we discuss a potential limitations of the current study:

**Problem domain.** In this work, we have selected English Resource Grammar as the target formalism. This is a deliberate choice based on the availability of (1) realistic out-of-distribution evaluation corpus, and (2) well-established, high-quality symbolic parser. This is a common setting in industrial applications, where an practitioner is tempted to combine large pre-trained neural model with expert-developed symbolic rules to improve performance for a new domain. Unfortunately, we are not aware of another popular meaning representation for which both resources are available. To overcome this challenge, we may consider studying collaborative inference between a standard seq2seq model and some indirect symbolic supervision, e.g., syntactic parser or CCG parser (Steedman, 2001), which is an interesting direction for future work.

**Uncertainty estimation techniques.** The naive seq2seq model is known to under-estimate the true probability of the high-likelihood output sequences, wasting a considerable amount of probability mass towards the space of improbable outputs (Ott et al., 2018; LeBrun et al., 2022). This systematic underestimation of neural likelihood may lead to a conservative neural-symbolic procedure that implicitly favors the information from the symbolic prior. It may also negatively impact calibration quality, leading the model to under-detect wrong predictions. To this end, it is interesting to ask if a more advanced seq2seq uncertainty method (e.g., Monte Carlo dropout or Gaussian process (Gal and Ghahramani, 2016; Liu et al., 2020)) can provide systematically better uncertainty quantification, and consequently improved downstream performance.

**Graphical model specification.** The GAP model presented in this work considers a classical graphical model likelihood  $p(G|x) = \prod_{v \in G} p(v | \text{pa}(v), x)$ , which leads to a clean factorization between graph elements  $v$  and fast probability computation. However, it also assumes a local Markov property that  $v$  is conditional independent to its ancestors given the parent  $\text{pa}(v)$ . In theory, the probability learned by a seq2seq model is capable of modeling higher order conditionals between arbitrary elements on the graph. Therefore it is interesting to ask if a more sophisticated graphical model with higher-order dependency structure

can lead to better performance in practice while maintaining reasonable computational complexity.

## Understanding different types of uncertainty.

There exists many different types of uncertainties occur in a machine learning system (Hüllermeier and Waegeman, 2021). This includes data uncertainty (e.g., erroneously annotated training labels, ill-formedness of the input sentence, or inherent ambiguity in the example-to-label mapping), and also model uncertainty which occurs the test example not containing familiar patterns the model learned from the training data. In this work, we quantifies uncertainty using mean log likelihood, which broadly captures both types of uncertainty and does not make a distinction between these different subtypes. As different source of uncertainty may lead to different strategy in neural-symbolic parsing, the future work should look into more fine-grained uncertainty signal that can decompose these different sources of error and uncertainty, and propose adaptive strategy to handle different scenarios.

## Ethical Consideration

This paper focused on neural-symbolic semantic parsing for the English Resource Grammar (ERG). Our architecture are built based on open-source models and datasets (all available online). We do not anticipate any major ethical concerns.

## References

- Omri Abend and Ari Rappoport. 2013. [Universal Conceptual Cognitive Annotation \(UCCA\)](#). In *Proceedings of the 51st Annual Meeting of the Association for Computational Linguistics (Volume 1: Long Papers)*, pages 228–238, Sofia, Bulgaria. Association for Computational Linguistics.
- Laura Banarescu, Claire Bonial, Shu Cai, Madalina Georgescu, Kira Griffitt, Ulf Hermjakob, Kevin Knight, Philipp Koehn, Martha Palmer, and Nathan Schneider. 2013. [Abstract Meaning Representation for sembanking](#). In *Proceedings of the 7th Linguistic Annotation Workshop and Interoperability with Dis-course*, pages 178–186, Sofia, Bulgaria. Association for Computational Linguistics.
- Guntis Barzdins and Didzis Gosko. 2016. [RIGA at SemEval-2016 task 8: Impact of Smatch extensions and character-level neural translation on AMR parsing accuracy](#). In *Proceedings of the 10th International Workshop on Semantic Evaluation (SemEval-2016)*, pages 1143–1147, San Diego, California. Association for Computational Linguistics.

- Johan Bos, Stephen Clark, Mark Steedman, James R Curran, and Julia Hockenmaier. 2004. Wide-coverage semantic representations from a ccg parser. In *COLING 2004: Proceedings of the 20th International Conference on Computational Linguistics*, pages 1240–1246.
- Jan Buys and Phil Blunsom. 2017. [Robust incremental neural semantic graph parsing](#). In *Proceedings of the 55th Annual Meeting of the Association for Computational Linguistics (Volume 1: Long Papers)*, pages 1215–1226, Vancouver, Canada. Association for Computational Linguistics.
- Shu Cai and Kevin Knight. 2013. [Smatch: an evaluation metric for semantic feature structures](#). In *Proceedings of the 51st Annual Meeting of the Association for Computational Linguistics (Volume 2: Short Papers)*, pages 748–752, Sofia, Bulgaria. Association for Computational Linguistics.
- Ulrich Callmeier. 2000. Pet—a platform for experimentation with efficient hpsg processing techniques. *Natural Language Engineering*, 6(1):99–107.
- Junjie Cao, Zi Lin, Weiwei Sun, and Xiaojun Wan. 2021. [Comparing knowledge-intensive and data-intensive models for English resource semantic parsing](#). *Computational Linguistics*, 47(1):43–68.
- Yufei Chen, Weiwei Sun, and Xiaojun Wan. 2018. [Accurate SHRG-based semantic parsing](#). In *Proceedings of the 56th Annual Meeting of the Association for Computational Linguistics (Volume 1: Long Papers)*, pages 408–418, Melbourne, Australia. Association for Computational Linguistics.
- Yufei Chen, Yajie Ye, and Weiwei Sun. 2019. [Peking at MRP 2019: Factorization- and composition-based parsing for elementary dependency structures](#). In *Proceedings of the Shared Task on Cross-Framework Meaning Representation Parsing at the 2019 Conference on Natural Language Learning*, pages 166–176, Hong Kong. Association for Computational Linguistics.
- Jianpeng Cheng, Siva Reddy, Vijay Saraswat, and Mirella Lapata. 2019. [Learning an executable neural semantic parser](#). *Computational Linguistics*, 45(1):59–94.
- Jeremy Cole, Nanjiang Jiang, Panupong Pasupat, Luheng He, and Peter Shaw. 2021. [Graph-based decoding for task oriented semantic parsing](#). In *Findings of the Association for Computational Linguistics: EMNLP 2021*, pages 4057–4065, Punta Cana, Dominican Republic. Association for Computational Linguistics.
- Ann Copestake. 2009. [Invited Talk: slacker semantics: Why superficiality, dependency and avoidance of commitment can be the right way to go](#). In *Proceedings of the 12th Conference of the European Chapter of the ACL (EACL 2009)*, pages 1–9, Athens, Greece. Association for Computational Linguistics.
- Ann Copestake, Dan Flickinger, Carl Pollard, and Ivan A Sag. 2005. Minimal recursion semantics: An introduction. *Research on language and computation*, 3(2):281–332.
- Berthold Crysmann and Woodley Packard. 2012. [Towards efficient HPSG generation for German, a non-configurational language](#). In *Proceedings of COLING 2012*, pages 695–710, Mumbai, India. The COLING 2012 Organizing Committee.
- Dan Flickinger, Emily M. Bender, and Stephan Oepen. 2014. [Towards an encyclopedia of compositional semantics: Documenting the interface of the English Resource Grammar](#). In *Proceedings of the Ninth International Conference on Language Resources and Evaluation (LREC’14)*, pages 875–881, Reykjavik, Iceland. European Language Resources Association (ELRA).
- Yarin Gal and Zoubin Ghahramani. 2016. Dropout as a bayesian approximation: Representing model uncertainty in deep learning. In *international conference on machine learning*, pages 1050–1059. PMLR.
- Nathan Green and Zdeněk Žabokrtský. 2012. [Hybrid combination of constituency and dependency trees into an ensemble dependency parser](#). In *Proceedings of the Workshop on Innovative Hybrid Approaches to the Processing of Textual Data*, pages 19–26, Avignon, France. Association for Computational Linguistics.
- Thanh Lam Hoang, Gabriele Picco, Yufang Hou, Young-Suk Lee, Lam Nguyen, Dzung Phan, Vanessa López, and Ramon Fernandez Astudillo. 2021. Ensembling graph predictions for amr parsing. *Advances in Neural Information Processing Systems*, 34:8495–8505.
- Eyke Hüllermeier and Willem Waegeman. 2021. Aleatoric and epistemic uncertainty in machine learning: An introduction to concepts and methods. *Machine Learning*, 110(3):457–506.
- Angelina Ivanova, Stephan Oepen, Lilja Øvrelid, and Dan Flickinger. 2012. [Who did what to whom? a contrastive study of syntacto-semantic dependencies](#). In *Proceedings of the Sixth Linguistic Annotation Workshop*, pages 2–11, Jeju, Republic of Korea. Association for Computational Linguistics.
- Robert T Kasper. 1989. A flexible interface for linking applications to penman’s sentence generator. In *Speech and Natural Language: Proceedings of a Workshop Held at Philadelphia, Pennsylvania, February 21-23, 1989*.
- Yoon Kim. 2021. Sequence-to-sequence learning with latent neural grammars. *Advances in Neural Information Processing Systems*, 34:26302–26317.
- Ioannis Konstas, Srinivasan Iyer, Mark Yatskar, Yejin Choi, and Luke Zettlemoyer. 2017. [Neural AMR: Sequence-to-sequence models for parsing and generation](#). In *Proceedings of the 55th Annual Meeting of*

|     |                                                                                                                                                                                                                                                                                                                                                                                                                                                         |     |
|-----|---------------------------------------------------------------------------------------------------------------------------------------------------------------------------------------------------------------------------------------------------------------------------------------------------------------------------------------------------------------------------------------------------------------------------------------------------------|-----|
| 820 | <i>the Association for Computational Linguistics (Volume 1: Long Papers)</i> , pages 146–157, Vancouver, Canada. Association for Computational Linguistics.                                                                                                                                                                                                                                                                                             | 876 |
| 821 |                                                                                                                                                                                                                                                                                                                                                                                                                                                         | 877 |
| 822 |                                                                                                                                                                                                                                                                                                                                                                                                                                                         | 878 |
| 823 | Benjamin LeBrun, Alessandro Sordoni, and Timothy J. O'Donnell. 2022. <a href="#">Evaluating distributional distortion in neural language modeling</a> . In <i>International Conference on Learning Representations</i> .                                                                                                                                                                                                                                | 879 |
| 824 |                                                                                                                                                                                                                                                                                                                                                                                                                                                         | 880 |
| 825 |                                                                                                                                                                                                                                                                                                                                                                                                                                                         | 881 |
| 826 |                                                                                                                                                                                                                                                                                                                                                                                                                                                         | 882 |
| 827 | Zi Lin, Jeremiah Zhe Liu, and Jingbo Shang. 2022. <a href="#">Towards collaborative neural-symbolic graph semantic parsing via uncertainty</a> . In <i>Findings of the Association for Computational Linguistics: ACL 2022</i> , pages 4160–4173, Dublin, Ireland. Association for Computational Linguistics.                                                                                                                                           | 883 |
| 828 |                                                                                                                                                                                                                                                                                                                                                                                                                                                         | 884 |
| 829 |                                                                                                                                                                                                                                                                                                                                                                                                                                                         | 885 |
| 830 |                                                                                                                                                                                                                                                                                                                                                                                                                                                         | 886 |
| 831 |                                                                                                                                                                                                                                                                                                                                                                                                                                                         | 887 |
| 832 |                                                                                                                                                                                                                                                                                                                                                                                                                                                         | 888 |
| 833 | Jeremiah Liu, Zi Lin, Shreyas Padhy, Dustin Tran, Tania Bedrax Weiss, and Balaji Lakshminarayanan. 2020. Simple and principled uncertainty estimation with deterministic deep learning via distance awareness. <i>Advances in Neural Information Processing Systems</i> , 33:7498–7512.                                                                                                                                                                 | 889 |
| 834 |                                                                                                                                                                                                                                                                                                                                                                                                                                                         | 890 |
| 835 |                                                                                                                                                                                                                                                                                                                                                                                                                                                         | 891 |
| 836 |                                                                                                                                                                                                                                                                                                                                                                                                                                                         | 892 |
| 837 |                                                                                                                                                                                                                                                                                                                                                                                                                                                         | 893 |
| 838 |                                                                                                                                                                                                                                                                                                                                                                                                                                                         | 894 |
| 839 | Andrey Malinin and Mark Gales. 2020. Uncertainty estimation in autoregressive structured prediction. In <i>International Conference on Learning Representations</i> .                                                                                                                                                                                                                                                                                   | 895 |
| 840 |                                                                                                                                                                                                                                                                                                                                                                                                                                                         | 896 |
| 841 |                                                                                                                                                                                                                                                                                                                                                                                                                                                         | 897 |
| 842 |                                                                                                                                                                                                                                                                                                                                                                                                                                                         | 898 |
| 843 | Ryan McDonald. 2006. <i>Discriminative learning and spanning tree algorithms for dependency parsing</i> . University of Pennsylvania Philadelphia.                                                                                                                                                                                                                                                                                                      | 899 |
| 844 |                                                                                                                                                                                                                                                                                                                                                                                                                                                         | 900 |
| 845 |                                                                                                                                                                                                                                                                                                                                                                                                                                                         | 901 |
| 846 | Kevin P Murphy. 2012. <i>Machine learning: a probabilistic perspective</i> . MIT press.                                                                                                                                                                                                                                                                                                                                                                 | 902 |
| 847 |                                                                                                                                                                                                                                                                                                                                                                                                                                                         | 903 |
| 848 | Joakim Nivre. 2008. <a href="#">Algorithms for deterministic incremental dependency parsing</a> . <i>Computational Linguistics</i> , 34(4):513–553.                                                                                                                                                                                                                                                                                                     | 904 |
| 849 |                                                                                                                                                                                                                                                                                                                                                                                                                                                         | 905 |
| 850 |                                                                                                                                                                                                                                                                                                                                                                                                                                                         | 906 |
| 851 | Stephan Oepen, Omri Abend, Lasha Abzianidze, Johan Bos, Jan Hajič, Daniel Hershcovich, Bin Li, Tim O’Gorman, Nianwen Xue, and Daniel Zeman. 2020. <a href="#">MRP 2020: The second shared task on cross-framework and cross-lingual meaning representation parsing</a> . In <i>Proceedings of the CoNLL 2020 Shared Task: Cross-Framework Meaning Representation Parsing</i> , pages 1–22, Online. Association for Computational Linguistics.           | 907 |
| 852 |                                                                                                                                                                                                                                                                                                                                                                                                                                                         | 908 |
| 853 |                                                                                                                                                                                                                                                                                                                                                                                                                                                         | 909 |
| 854 |                                                                                                                                                                                                                                                                                                                                                                                                                                                         | 910 |
| 855 |                                                                                                                                                                                                                                                                                                                                                                                                                                                         | 911 |
| 856 |                                                                                                                                                                                                                                                                                                                                                                                                                                                         | 912 |
| 857 |                                                                                                                                                                                                                                                                                                                                                                                                                                                         | 913 |
| 858 |                                                                                                                                                                                                                                                                                                                                                                                                                                                         | 914 |
| 859 |                                                                                                                                                                                                                                                                                                                                                                                                                                                         | 915 |
| 860 | Stephan Oepen, Omri Abend, Jan Hajič, Daniel Hershcovich, Marco Kuhlmann, Tim O’Gorman, Nianwen Xue, Jayeol Chun, Milan Straka, and Zdenka Uresova. 2019. <a href="#">MRP 2019: Cross-framework meaning representation parsing</a> . In <i>Proceedings of the Shared Task on Cross-Framework Meaning Representation Parsing at the 2019 Conference on Natural Language Learning</i> , pages 1–27, Hong Kong. Association for Computational Linguistics. | 916 |
| 861 |                                                                                                                                                                                                                                                                                                                                                                                                                                                         | 917 |
| 862 |                                                                                                                                                                                                                                                                                                                                                                                                                                                         | 918 |
| 863 |                                                                                                                                                                                                                                                                                                                                                                                                                                                         | 919 |
| 864 |                                                                                                                                                                                                                                                                                                                                                                                                                                                         | 920 |
| 865 |                                                                                                                                                                                                                                                                                                                                                                                                                                                         | 921 |
| 866 |                                                                                                                                                                                                                                                                                                                                                                                                                                                         | 922 |
| 867 |                                                                                                                                                                                                                                                                                                                                                                                                                                                         | 923 |
| 868 |                                                                                                                                                                                                                                                                                                                                                                                                                                                         | 924 |
| 869 | Stephan Oepen and Dan Flickinger. 2019. <a href="#">The ERG at MRP 2019: Radically compositional semantic dependencies</a> . In <i>Proceedings of the Shared Task on Cross-Framework Meaning Representation Parsing at the 2019 Conference on Natural Language Learning</i> , pages 40–44, Hong Kong. Association for Computational Linguistics.                                                                                                        | 925 |
| 870 |                                                                                                                                                                                                                                                                                                                                                                                                                                                         | 926 |
| 871 |                                                                                                                                                                                                                                                                                                                                                                                                                                                         | 927 |
| 872 |                                                                                                                                                                                                                                                                                                                                                                                                                                                         | 928 |
| 873 |                                                                                                                                                                                                                                                                                                                                                                                                                                                         | 929 |
| 874 |                                                                                                                                                                                                                                                                                                                                                                                                                                                         | 930 |
| 875 |                                                                                                                                                                                                                                                                                                                                                                                                                                                         | 931 |
|     | Stephan Oepen, Marco Kuhlmann, Yusuke Miyao, Daniel Zeman, Silvie Cinková, Dan Flickinger, Jan Hajič, and Zdeňka Urešová. 2015. <a href="#">SemEval 2015 task 18: Broad-coverage semantic dependency parsing</a> . In <i>Proceedings of the 9th International Workshop on Semantic Evaluation (SemEval 2015)</i> , pages 915–926, Denver, Colorado. Association for Computational Linguistics.                                                          |     |
|     | Stephan Oepen and Jan Tore Lønning. 2006. <a href="#">Discriminant-based MRS banking</a> . In <i>Proceedings of the Fifth International Conference on Language Resources and Evaluation (LREC’06)</i> , Genoa, Italy. European Language Resources Association (ELRA).                                                                                                                                                                                   |     |
|     | Stephan Oepen, Kristina Toutanova, Stuart Shieber, Christopher Manning, Dan Flickinger, and Thorsten Brants. 2002. <a href="#">The LinGO redwoods treebank: Motivation and preliminary applications</a> . In <i>COLING 2002: The 17th International Conference on Computational Linguistics: Project Notes</i> .                                                                                                                                        |     |
|     | Myle Ott, Michael Auli, David Grangier, and Marc’Aurelio Ranzato. 2018. Analyzing uncertainty in neural machine translation. In <i>International Conference on Machine Learning</i> , pages 3956–3965. PMLR.                                                                                                                                                                                                                                            |     |
|     | Xiaochang Peng and Daniel Gildea. 2016. <a href="#">UofR at SemEval-2016 task 8: Learning synchronous hyperedge replacement grammar for AMR parsing</a> . In <i>Proceedings of the 10th International Workshop on Semantic Evaluation (SemEval-2016)</i> , pages 1185–1189, San Diego, California. Association for Computational Linguistics.                                                                                                           |     |
|     | Xiaochang Peng, Linfeng Song, and Daniel Gildea. 2015. <a href="#">A synchronous hyperedge replacement grammar based approach for AMR parsing</a> . In <i>Proceedings of the Nineteenth Conference on Computational Natural Language Learning</i> , pages 32–41, Beijing, China. Association for Computational Linguistics.                                                                                                                             |     |
|     | Xiaochang Peng, Chuan Wang, Daniel Gildea, and Nianwen Xue. 2017. <a href="#">Addressing the data sparsity issue in neural AMR parsing</a> . In <i>Proceedings of the 15th Conference of the European Chapter of the Association for Computational Linguistics: Volume 1, Long Papers</i> , pages 366–375, Valencia, Spain. Association for Computational Linguistics.                                                                                  |     |
|     | Carl Pollard and Ivan A Sag. 1994. <i>Head-driven phrase structure grammar</i> . University of Chicago Press.                                                                                                                                                                                                                                                                                                                                           |     |
|     | Colin Raffel, Noam Shazeer, Adam Roberts, Katherine Lee, Sharan Narang, Michael Matena, Yanqi Zhou, Wei Li, and Peter J Liu. 2020. Exploring the limits of transfer learning with a unified text-to-text transformer. <i>Journal of Machine Learning Research</i> , 21:1–67.                                                                                                                                                                            |     |
|     | Peter Shaw, Ming-Wei Chang, Panupong Pasupat, and Kristina Toutanova. 2021. <a href="#">Compositional generalization and natural language variation: Can a semantic parsing approach handle both?</a> In <i>Proceedings of the</i>                                                                                                                                                                                                                      |     |



59th Annual Meeting of the Association for Computational Linguistics and the 11th International Joint Conference on Natural Language Processing (Volume 1: Long Papers), pages 922–938, Online. Association for Computational Linguistics.

Mark Steedman. 2001. *The syntactic process*. MIT press.

Kristina Toutanova, Christopher D Manning, Dan Flickinger, and Stephan Oepen. 2005. Stochastic hpsg parse disambiguation using the redwoods corpus. *Research on Language and Computation*, 3(1):83–105.

Hiroyasu Yamada and Yuji Matsumoto. 2003. *Statistical dependency analysis with support vector machines*. In *Proceedings of the Eighth International Conference on Parsing Technologies*, pages 195–206, Nancy, France.

## A Graph-based Meaning Representation

Considerable NLP research has been devoted to the transformation of natural language utterances into a desired linguistically motivated semantic representation. Such a representation can be understood as a class of discrete structures that describe lexical, syntactic, semantic, pragmatic, as well as many other aspects of the phenomenon of human language. In this domain, graph-based representations provide a light-weight yet effective way to encode rich semantic information of natural language sentences and have been receiving heightened attention in recent years. Popular frameworks under this umbrella includes Bi-lexical Semantic Dependency Graphs (SDG; Bos et al., 2004; Ivanova et al., 2012; Oepen et al., 2015), Abstract Meaning Representation (AMR; Banarescu et al., 2013), Graph-based Representations for English Resource Grammar (ERG; Oepen and Lønning, 2006; Copestake, 2009), and Universal Conceptual Cognitive Annotation (UCCA; Abend and Rappoport, 2013).

## B Literature Review on Graph Semantic Parsing

In this section, we present a summary of different parsing technologies for graph-based meaning representations in addition to the ones discussed in 2.2, with a focus on English Resource Grammar (ERG).

**Grammar-based approach** In this type of approach, a semantic graph is derived according to a set of lexical and syntactico-semantic rules. For

ERG parsing, sentences are parsed to HPSG derivations consistent with ERG. The nodes in the derivation trees are feature structures, from which MRS is extracted through unification. The parser has a default parse ranking procedure trained on a treebank, where maximum entropy models are used to score the derivations in order to find the most likely parse. However, this approach fails to parse sentences for which no valid derivation is found (Toutanova et al., 2005). There are two main existing grammar-based parsers for ERG parsing: the PET system (Callmeier, 2000) and the ACE system (Crysmann and Packard, 2012). The core algorithms implemented by both systems are the same, but ACE is faster in certain common configurations. We choose ACE as the symbolic parser in our work.

**Factorization-based approach** This type of approach is inspired by graph-based dependency tree parsing (McDonald, 2006). A factorization-based parser explicitly models the target semantic structures by defining a score function that can evaluate the probability of any candidate graph. For ERG parsing, Cao et al. (2021) implemented a two-step pipeline architecture that identifies the concept nodes and dependencies by solving two optimization problems, where prediction of the first step is utilized as the input for the second step. Chen et al. (2019) presented a four-stage pipeline to incrementally construct an ERG graph, whose core idea is similar to previous work.

**Transition-based approach** In these parsing systems, the meaning representations graph is generated via a series of actions, in a process that is very similar to dependency tree parsing (Yamada and Matsumoto, 2003; Nivre, 2008), with the difference being that the actions for graph parsing need to allow reentrancies. For ERG parsing, Buys and Blunsom (2017) proposed a neural encoder-decoder transition-based parser, which uses stack-based embedding features to predict graphs jointly with unlexicalized predicates and their token alignments.

**Composition-based approach** Following a principle of compositionality, a semantic graph can be viewed as the result of a derivation process, in which a set of lexical and syntactico-semantic rules are iteratively applied and evaluated. For ERG parsing, based on Chen et al. (2018), Chen et al. (2019) proposed a composition-based parser whose core engine is a graph rewriting system that explicitly



explores the syntactico-semantic recursive derivations that are governed by a synchronous SHRG.

**Translation-based approach** This type of approach is inspired by the success of seq2seq models which are the heart of modern Neural Machine Translation. A translation-based parser encodes and views a target semantic graph as a string from another language. In a broader context of graph semantic parsing, simply applying seq2seq models is not successful, in part because effective linearization (encoding graphs as linear sequences) and data sparsity were thought to pose significant challenges (Konstas et al., 2017). Alternatively, some specifically designed preprocessing procedures for vocabulary and entities can help to address these issues (Konstas et al., 2017; Peng et al., 2017). These preprocessing procedures are very specific to a certain type of meaning representation and are difficult to transfer to others. To address this, Lin et al. (2022) propose a variable-free top-down linearization and a compositionality-aware tokenization for ERG graph preprocessing, and successfully transfer the ERG parsing into a translation problem that can be solved by a state-of-the-art seq2seq model T5 (Raffel et al., 2020). The parser achieves the best known results on the in-domain test set from the DeepBank benchmark.

## C Related Work

**Neural-Symbolic Graph Semantic Parsing.** Though neural models excel at semantic parsing, they have been shown to struggle with out-of-distribution compositional generalization, while grammar or rule-based approaches work relatively robustly. This has motivated the work in neural-symbolic parsing where symbolic approaches are imported as inductive bias (Shaw et al., 2021; Kim, 2021; Cheng et al., 2019; Cole et al., 2021). For graph meaning representations, importing inductive bias into neural model was somehow difficult due to the much more complicated structure compared to pure syntactic rules or logical formalism (Peng et al., 2015; Peng and Gildea, 2016). To address this, Lin et al. (2022) proposes a collaborative framework by designing a decision criterion for beam search that incorporates the prior knowledge from a symbolic parser and accounts for model uncertainty, which achieves the state-of-the-art results on the in-domain test set.

**Ensemble Learning for Graph Parsing.** Ensemble learning is a popular machine learning approach

that combines predictions from multiple candidates to create a new one that is more robust and accurate than individual predictions. Previous studies have explored various ensemble learning approaches for graph parsing (Green and Žabokrtský, 2012; Barzdins and Gosko, 2016). Specifically, for graph semantic parsing at subgraph level, Hoang et al. (2021) make use of checkpoints from models of different architectures, and mining the largest graph that is the most supported by a collection of graph predictions. They then propose a heuristic algorithm to approximate the optimal solution.

Compare to the previous ensemble work, our work differ in three ways: (1) Our decision rule is based on neural model confidence, so the decision is driven not by model consensus, but by model confidence which indicates when the main (neural) result is untrustworthy and needs to be complemented by symbolic result. Model consensus is effective when there exists a large number of candidate models. However, in the neural-symbolic setting when there are only two models, the ability of quantifying model uncertainty becomes important. (2) A secondary contribution of our work is to produce an parsing approach for the ERG community that not only exhibits strong average-case performance on in-domain and OOD environments, but also generalizes robustly in important categories of tail linguistic phenomena. Therefore, our investigation goes beyond average-case performance and evaluates in tail generalization as well. (3) We reveal a more nuance picture of neural models’ OOD performance: a neural model’s top K parses in fact often contains subgraphs that generalize well to OOD scenarios, but the vanilla MLE-based inference fails to select them (see Section 5.4 for more details).

## D Additional Methods Discussions

### D.1 Efficient Probability Estimation Using Beam Outputs

The marginalized probability  $\hat{p}(s_i|x)$  provides a way to reason about the *global* importance of  $s_i$  by integrating the probabilistic evidence  $p(s_i|s_{k,<i}, x)$  over the whole beam-sampled posterior space. It is able to capture the cases of spurious graph elements  $s_i$  with high local probability  $p(s_i|s_{k,<i}, x)$  but low global likelihood (i.e., only appear in a few low-probability beam candidates), which is useful for inferring sparse global structures for the meta graph (Appendix F).

In the importance weight  $\pi_k$ , the temperature parameter  $t$  controls how evidence for  $p(s_i|x)$  is aggregated across beam samples  $\{g_k\}_{k=1}^K$ . When  $t \rightarrow 0$ , the above is equivalent to selecting  $p(s_i|s_{k,<i}, x)$  from the most probable subsequence  $s_{k,<i}$ ; when  $t \rightarrow \infty$ , the above is equivalent to simple averaging of  $p(s_i|s_{k,<i}, x)$  from all beam candidates. In the experiments, we find that the value of  $t$  does not have a significant impact on the final performance. In general, we recommend fixing it to a small value (e.g.,  $t = 0.1$ ) to suitably downweighting the contribution from improbable beam candidates.

## E Simplified Expression for Graphical Model Likelihood

Given the candidates graphs  $\{G_k\}_{k=1}^K$ , we can express the likelihood for  $p(v|\text{pa}(v), x)$  by writing down a multinomial likelihood enumerating over different values of  $\text{pa}(v)$  (Murphy, 2012). For example, say  $\text{pa}(n) = (e_1, e_2)$  which represents a subgraph of two edges  $(e_1, e_2)$  pointing into a node  $n$ . Then the conditional probability  $p(n|\text{pa}(n), x)$  can be computed by enumerating over the observed values of  $(e_1, e_2)$  pair:

$$p(n|\text{pa}(n), x) = p(n|(e_1, e_2), x) \\ \propto \prod_{c \in \text{Candidate}(e_1, e_2)} p(n|(e_1, e_2) = c, x)^{K_c}$$

where  $\text{Candidate}(e)$  is the collection of possible symbols  $s$  the variable  $e$  can take, and  $K_c$  is the number of times  $(e_1, e_2)$  takes a particular value  $c \in \text{Candidate}(e_1, e_2) = \text{Candidate}(e_1) \times \text{Candidate}(e_2)$ .

Then, the log likelihood becomes:

$$\log p(n|\text{pa}(n), x) \\ = \sum_c K_c * \log p(n|(e_1, e_2) = c)$$

To simplify this above expression, we notice that  $\log p(n|\text{pa}(n), x)$  can be divided by the constant beam size  $K$  without impacting the inference. As a result, the log probability can be computed by simplify averaging the values of  $\log p(v|\text{pa}(v) = c_k)$  across the beam candidates:

$$\log p(n|\text{pa}(n), x) \\ \propto \sum_c \frac{K_c}{K} \log p(n|(e_1, e_2) = c) \\ = \frac{1}{K} \sum_{k=1}^K \log p(n|(e_1, e_2) = c_k)$$

where  $c_k$  is the value of  $(e_1, e_2)$  in  $k^{\text{th}}$  beam candidate.

## F Extensions and Practical Implementation

### F.1 Infer Sparse Global Structure via Likelihood-based Pruning

In practice, the meta graph  $\mathcal{G}$  can contain spurious elements  $v$  that have a high local likelihoods  $\log p(v|\text{pa}(v), x)$  but very low global probabilities  $p(v|x)$ . This happens when the element  $v$  only appears in a few low-probability beam sequences. These spurious nodes and edges often adds redundancy to the generated graph (i.e., hurting precision), and cannot be eliminated by the neural-symbolic inference procedure, due to their high local conditional probability  $p(v|\text{pa}(v), x)$ .

Consequently, we find it empirically effective to perform sparse structure inference for  $\mathcal{G}$  based on global probabilities  $p(v|x)$  before diving into local neural-symbolic prediction for graph components. In this work, we carry out this global structure inference by considering a simple threshold-and-project procedure, i.e., pruning out all the graph elements whose global probability  $\|p(v|x)\|_\infty = \max_{s \in \text{Candidate}(v)} p(v = s|x)$  is lower than a threshold  $t$ , but will keep  $v$  if its removal will lead to an invalid graph with disconnected subcomponents. Here  $\|p(v|x)\|_\infty$  is the total variation metric that returns the maximum probability.

Algorithm 3 summarizes this procedure. From a theoretical perspective, this is equivalent to finding the most sparse solution with respect to threshold  $t$  within the space of valid (i.e., connected) subgraphs of  $\mathcal{G}$ .

---

#### Algorithm 3 Likelihood-based Pruning

---

**Inputs:**

Meta Graph  $\mathcal{G}_M$   
Marginal probabilities  $\{p(s|x)\}_{s \in \mathcal{G}}$   
Threshold  $t$

**Output:**

Pruned graph  $\mathcal{G}'_M$

**Initialize:**

$\mathcal{G}'_M = \mathcal{G}_M$

**for**  $v \in \mathcal{G}'_M$  **do**

**if**  $\|p(v|x)\|_\infty < t$  **AND**  $\mathcal{G}'_M \setminus \{v\}$  is connected **then**  
Prune  $v$  :  $\mathcal{G}'_M = \mathcal{G}'_M \setminus \{v\}$

**return**  $\mathcal{G}'_M$

---

### F.2 Handle Multi-modality via Mixture Modeling

In some rare cases where the input sentence is fragmented or ill-formed, the neural model may output

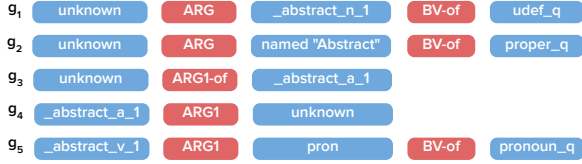

Figure 4: Autoregressive Representation (i.e., beam sequences) for the sentence “Abstract” from the Eric Raymond Essay dataset. Note that  $g_3$  and  $g_4$  are actually the same graph but with different linearization orders.

multiple beam sequences with drastically different high-level structures, creating difficulty for the graph merging procedure (See Figure 4 for an example).

We can handle this multi-modality in observed graph structure by extending  $p(G|x)$  to be a mixture of GAP distributions, so that the graphical model likelihood becomes:

$$p(G|x) = \sum_{m \in M} p(G|m, x) p(m|x)$$

where  $p(m|x)$  is a categorical distribution over the mixture components  $m \in M$ . Here each component  $m$  induce a meta graph  $\mathcal{G}_m$  for graph  $G_m = \langle \mathbf{N}_m, \mathbf{E}_m \rangle$ , such that

$$\begin{aligned} p(G|m, x) &= p(G_m|x) = \prod_{v \in G_m} p(v | \text{pa}(v), x) \\ &= \prod_{n \in \mathbf{N}_m} p(n | \text{pa}(n), x) * \prod_{e \in \mathbf{E}_m} p(e | \text{pa}(e), x) \end{aligned}$$

Given beam sequences  $\{g_k\}_{k=1}^K$ , the mixture components can be estimated using a standard clustering algorithm based on an edit distance between beam candidate  $g_k$ . Based on our experiments, hierarchical agglomerative clustering (HAC) combined with the longest common subsequence (LCS) distance often leads to the best result. After clustering,  $p(m|x)$  is computed as the empirical probability of beam sequences belonging the  $m^{\text{th}}$  cluster, and the meta graph  $\mathcal{G}_m$  is computed by applying the graph merging procedure to the beam sequences in the  $m^{\text{th}}$  cluster.

To conduct neural symbolic inference, we also need to define the symbolic prior  $p_0$  for the mixture distribution:

$$\begin{aligned} p_0(G) &= \sum_{m \in M} p_0(G|m) * p_0(m) \\ &= \sum_{m \in M} [\prod_{v \in G_m} p_0(v) * p_0(m)] \end{aligned}$$

where  $p_0(v = s) \propto \exp(I(s \in G_0))$  as define previously, and we define  $p_0(m) = \exp(-\text{SMATCH}(G_m, G_0))$  following the previous work (Lin et al., 2022).

As a result, the decision criteria for neural-symbolic inference under the mixture model becomes:

$$R(G_m|x) = R(m|x) + \sum_{v \in G_m} R(v|x)$$

where  $\sum_{v \in G_m} R(v|x)$  is the component-wise decision criteria as defined in the main text, and  $R(m|x)$  is the additional term for the mixture components:

$$\begin{aligned} R(m|x) &= \alpha(m|x) * \log p(m|x) \\ &\quad + (1 - \alpha(m|x)) * \log p_0(m) \end{aligned}$$

where  $\alpha(m|x) = \sigma(-\frac{1}{T}H(m|x) + b)$  is the trade-off parameter driven by the average log likelihood of beam sequences in the  $m^{\text{th}}$  cluster  $C_m$ , i.e.,  $H(m|x) = \frac{1}{|C_m|} \sum_{g_k \in C_m} -\log(g_k|x)$ .

During inference, we can again proceed in a greedy fashion, first select the optimal  $\hat{m}$  based on  $R(m|x)$ , and then perform compositional neural-symbolic inference with respect to  $\mathcal{G}_{\hat{m}}$  using  $\sum_{v \in G_{\hat{m}}} R(v|x)$ .

---

#### Algorithm 4 Complete Procedure with All Extensions

---

**Inputs:**

Beam candidates and associated token-level probabilities  $\{p(g_k|x)\}_{k=1}^K$

**Output:**

Neural-symbolic graph prediction  $G$

**(Optional) Estimate:**

Mixture components  $\{\mathcal{G}_m\}_{m=1}^M, \{p(m|x)_{m=1}^M\}$  from **Cluster**  $\{p(g_k|x)\}_{k=1}^K$

Optimal mixture components  $\mathcal{G} = \mathcal{G}_{\hat{m}}$ , where  $\hat{m} = \arg \max R(m|x)$

**Estimate:**

Marginal probability and graphical model likelihood (Algorithm 2):

$$\{p(v|x)\}_{v \in G}, \log p(G|x) = \mathbf{GAP}(\mathcal{G})$$

**Infer:**

Global graph structure via likelihood-based pruning (Algorithm 3)

$$G' = \mathbf{ThresholdAndProject}(G, \{p(v|x)\}_{v \in G})$$

Local node / edge prediction via compositional neural-symbolic inference (Algorithm 1)

$$G = \mathbf{NeuralSymbolicInference}(G')$$


---

As a result, the complete procedure with all optional extensions are shown in Algorithm 4.

## G Graph Matching Algorithm

In general, finding the largest common subgraph is a well-known computationally intractable problem in graph theory. However, for graph parsing problems where graphs have labels and a simple tree-like structure, some efficient heuristics are proposed to approximate the best match by a hill-climbing algorithm (Cai and Knight, 2013). The initial match is modified iteratively to optimize the total number of matches with a predefined number of iterations (default value set to 5). This algorithm is very efficient and effective, it was also used to calculate the SMATCH score in Cai and Knight (2013).

## H Details for OOD Datasets

**Wikipedia (Wiki)** The DeepBank team constructed a treebank for 100 Wikipedia articles on Computational Linguistics and closely related topics. The treebank of 11,558 sentences comprises 16 sets of articles. The corpus contains mostly declarative, relatively long sentences, along with some fragments.

**The Brown Corpus (Brown)** The Brown Corpus was a carefully compiled selection of current American English, totalling about a million words drawn from a wide variety of sources.

**The Eric Raymond Essay (Essay)** The treebank is based on translations of the essay “The Cathedral and the Bazaar” by Eric Raymond. The average length and the linguistic complexity of these sentences is markedly higher than the other treebanked corpora.

**E-commerce** While the ERG was being used in a commercial software product developed by the YY Software Corporation for automated response to customer emails, a corpus of training and test data was constructed and made freely available, consisting of email messages composed by people pretending to be customers of a fictional consumer products online store. The messages in the corpus fall into four roughly equal-sized categories: Product Availability, Order Status, Order Cancellation, and Product Return.

**Meeting/hotel scheduling (Verbmobil)** This dataset is a collection of transcriptions of spoken dialogues, each of which reflected a negotiation either to schedule a meeting, or to plan a hotel stay. One dialogue usually consists of 20-30 turns, with

most of the utterances relatively short, including greetings and closings, and not surprisingly with a high frequency of time and date expressions as well as questions and sentence fragments.

**Norwegian tourism (LOGON)** The Norwegian/English machine translation research project LOGON acquired for its development and evaluation corpus a set of tourism brochures originally written in Norwegian and then professionally translated into English. The corpus consists almost entirely of declarative sentences and many sentence fragments, where the average number of tokens per item is higher than in the Verbmobil and E-commerce data.

**The Tanaka Corpus (Tanaka)** This treebank is based on parallel Japanese-English sentences, which was adopted to be used with in the WWWJDIC dictionary server as a set of example sentences associated within words in the dictionary.

## I Implementation and Hyperparameters

**T5 Model** We use the open-sourced T5X<sup>4</sup>, which is a new and improved implementation of T5 codebase in JAX and Flax. Specifically, we use the official pretrained T5-Large (770 million parameters), which is the same size as the one used in Lin et al. (2022), and finetuned it on DeepBank in-domain training set. Specifically, the total training step is 1,750,000 including 1,000,000 pretrain steps. For fine-tuning the T5 model on ERG parsing, batch size is set to 128, the output and input sequence length is set to 512, and dropout rate is set to 0.1.

**Hyperparameters** For the trade-off parameter  $\alpha(v|x) = \sigma(-\frac{1}{T}H(v|x) + b)$ , we set temperature  $T = 0.1$  and bias  $b = 0.25$ .

## J In-domain Evaluation

Table 4 shows the in-domain performance, where we compare our parser with the grammar-based ACE parser and other data-driven parsers. The baseline models also include a similar practice with (Shaw et al., 2021) and (Hoang et al., 2021). The former one takes T5 as a backup for grammar-based parser (ACE), and the latter gets ensembled graph via a voting strategy based on the candidates from the T5 parser and ACE parser.

<sup>4</sup><https://github.com/google-research/t5x>



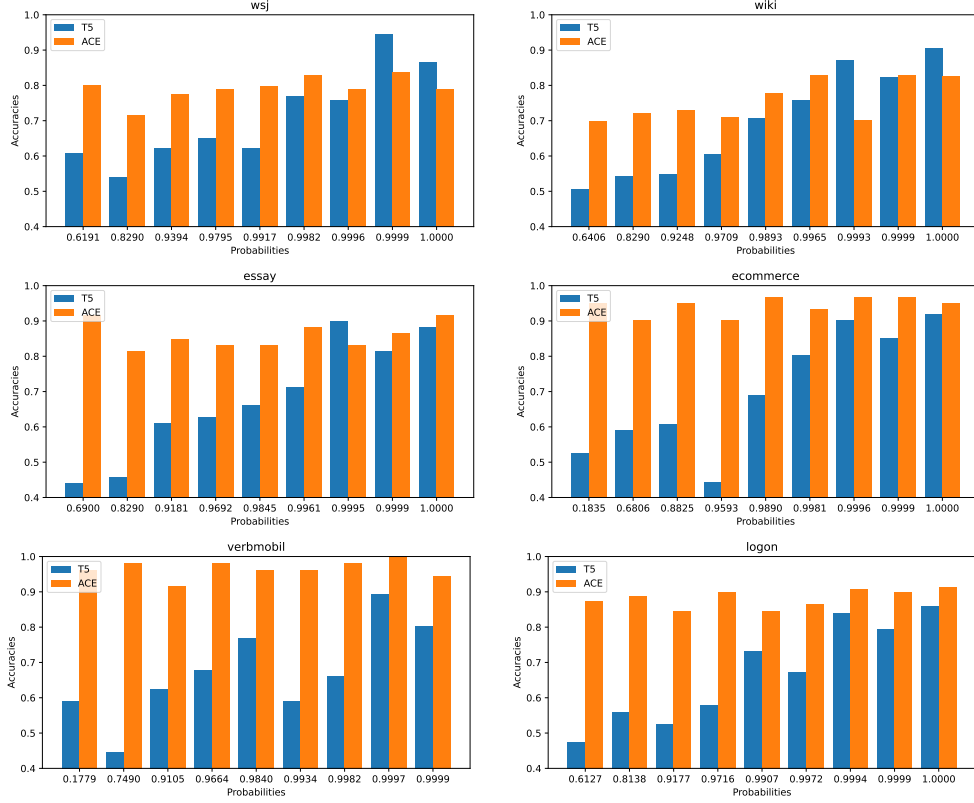

Figure 5: Diagrams for the T5 model’s probabilities verses the T5 model’s and ACE parser’s accuracies at subgraph level on the other datasets. Each bin contains the same number of examples. Since at most of the subgraphs, the model is pretty certain ( $\log P > -1e - 5$ ), we exclude these pretty certain predictions in the figures.

| Model                                 | Node         | Edge         | SMATCH       |
|---------------------------------------|--------------|--------------|--------------|
| ACE                                   | 89.30        | 85.05        | 87.14        |
| ACE*                                  | 93.18        | 88.76        | 90.94        |
| Buy and Blunsom (2017)                | 89.06        | 84.96        | 87.00        |
| Chen et al. (2018)                    | 94.51        | 87.29        | 90.86        |
| Chen et al. (2019)                    | 95.63        | 91.43        | 93.56        |
| Chen et al. (2019)                    | 97.28        | 94.03        | 95.67        |
| Cao et al. (2021)                     | 96.42        | 93.73        | 95.05        |
| ACE-T5 (following Shaw et al. (2021)) | 93.46        | 89.19        | 91.30        |
| T5-based (Lin et al., 2022)           | 97.34        | 95.80        | 96.56        |
| + Hoang et al. (2021)                 | 88.89        | 87.67        | 88.22        |
| + Lin et al. (2022)                   | <b>97.64</b> | <b>96.41</b> | <b>97.01</b> |
| + Ours                                | 97.50        | 96.07        | 96.77        |

Table 4: F1 score for node and edge predictions and the SMATCH scores on the in-domain test set. ACE\* refers to evaluation results only for valid parse.

From the table we can see that our methods outperforms the base model (T5-based) and most of the previous work. Specifically, we achieves a SMATCH score of 96.77, which is a 6.11% error reduction compared to the base T5 parser.

## K Fine-grained Linguistic Phenomena

**Lexical construction** ERG uses the abstract node compound to denote compound words. The

edge labeled with ARG1 refers to the root of the compound word, and thus can help to further distinguish the type of the compound into (1) nominal with normalization, e.g., “flag burning”; (2) nominal with noun, e.g., “pilot union”; (3) verbal, e.g., “state-owned”; (4) named entities, e.g., “West Germany”.

**Argument structure** In ERG, there are different types of core predicates in argument structures, specifically, verbs, nouns and adjectives. We also categorize verb in to basic verb (e.g., `_look_v_1`) and verb particle constructions (e.g., `_look_v_up`). The verb particle construction is handled semantically by having the verb contribute a relation particular to the combination.

**Coreference** ERG resolves sentence-level coreference, i.e., if the sentence referring to the same entity, the entity will be an argument for all the nodes that it is an argument of, e.g., in the sentence, “What we want to do is take a more aggressive stance”, the predicates “want” (`_want_v_1`) and “take” (`_take_v_1`) share the same agent “we” (pron). Coreference can be presented as reentran-

cies in the ERG graph, we notice that one important type of reentrancies is the passive construction, so we also report evaluation on passive construction in Table 2.

## **L Calibration Performance on Other Datasets**

The correlations between the subgraph’s probability and performance on other datasets are shown in Figure 5. The conclusions drew from the figure is similar to the one discussed in Section 3.
